1  
2  
3  
4  
5  
6  
7  
8  
9  
10  
11  
12  
13  
14  
15  
16  
17  
18  
19  
20  
21  
22  
23  
24  
25  
26  
27  
28  
29  
30  
31  
32  
33

**Marine deep biosphere microbial communities assemble in near-surface  
sediments in Aarhus Bay**

Caitlin Petro\*<sup>1a</sup>, Birthe Zäncker\*<sup>1</sup>, Piotr Starnawski<sup>1</sup>, Lara M. Jochum<sup>1</sup>, Timothy G.  
Ferdelman<sup>2</sup>, Bo Barker Jørgensen<sup>1</sup>, Hans Røy<sup>1</sup>, Kasper U. Kjeldsen<sup>1</sup>, and Andreas  
Schramm<sup>1</sup>

<sup>1</sup>*Center for Geomicrobiology and Section for Microbiology, Department of  
Bioscience, Aarhus University, Aarhus, Denmark*

<sup>2</sup>*Max-Planck Institute for Marine Microbiology, Department of Biogeochemistry,  
Bremen, Germany*

\*These authors contributed equally to this work

**Correspondence:**

Caitlin Petro  
cpetro@gatech.edu

**<sup>a</sup>Present address:**

Georgia Institute of Technology  
School of Biological Sciences  
310 Ferst Drive  
Atlanta, Georgia 30032

## 34 **Abstract**

35 Analyses of microbial diversity in marine sediments have identified a core set of taxa  
36 unique to the marine deep biosphere. Previous studies have suggested that these  
37 specialized communities are shaped by processes in the surface seabed, in particular  
38 that their assembly is associated with the transition from the bioturbated upper zone to  
39 the nonbioturbated zone below. To test this hypothesis, we performed a fine-scale  
40 analysis of the distribution and activity of microbial populations within the upper 50  
41 cm of sediment from Aarhus Bay (Denmark). Sequencing and qPCR were combined to  
42 determine the depth distributions of bacterial and archaeal taxa (16S rRNA genes) and  
43 sulfate-reducing microorganisms (*dsrB* gene). Mapping of radionuclides throughout the  
44 sediment revealed a region of intense bioturbation at 0-6 cm depth. The transition from  
45 bioturbated sediment to the subsurface below (7 cm depth) was marked by a shift from  
46 dominant surface populations to common deep biosphere taxa (e.g. Chloroflexi &  
47 Atribacteria). Changes in community composition occurred in parallel to drops in  
48 microbial activity and abundance caused by reduced energy availability below the  
49 mixed sediment surface. These results offer direct evidence for the hypothesis that deep  
50 subsurface microbial communities present in Aarhus Bay mainly assemble already  
51 centimeters below the sediment surface, below the bioturbation zone.

52

53

## 54 **1. Introduction**

55 Marine sediments are a massive microbial habitat, harboring as many as  $5.39 \times 10^{29}$   
56 prokaryotic cells on a global scale and 0.18-3.6% of Earth's total living biomass  
57 (Kallmeyer et al., 2012; Parkes et al., 2014). Microorganisms deposited on the sediment  
58 surface are gradually buried into the seabed as sedimenting particulate matter  
59 accumulates on the seafloor. This burial can isolate microorganisms from the surface  
60 world for hundreds to millions of years, cutting populations off from fresh detrital  
61 organic matter and subjecting them to severe energetic limitations that increase with  
62 sediment depth (Langerhuus et al., 2012; Lomstein et al., 2012; Middelburg, 1989).  
63 Despite these energy limitations, deep marine sediments are populated by living  
64 microbial communities that persist down to 2.5 km below the seafloor (reviewed in  
65 Parkes *et al.*, 2014; Inagaki *et al.*, 2015). Phylogenetic diversity (16S rRNA gene)  
66 analyses of the subsurface environment have identified a core set of uncultivated  
67 microbial taxa that have become synonymous with the marine deep biosphere (Parkes

68 *et al.*, 2014; Carr *et al.*, 2015; Orcutt *et al.*, 2011; Kubo *et al.*, 2012; Biddle *et al.*, 2006;  
69 Teske, 2006). But at which sediment depth and by which processes these deep  
70 subsurface communities are formed remains unclear.  
71 Work thus far has suggested that selective survival is the major driver of microbial  
72 community assembly in subsurface marine sediments (Jochum *et al.*, 2017; Petro *et al.*,  
73 2017; Starnawski *et al.*, 2017; Walsh *et al.*, 2015). Selection filters out populations  
74 during burial, creating a deep subsurface biosphere that is populated by rare  
75 descendants of the surface sediment community (Jochum *et al.*, 2017; Starnawski *et al.*,  
76 2017). Persisting taxa exhibit little genetic diversification across sediment depths,  
77 suggesting that adaption to deep biosphere conditions plays a limited role in driving the  
78 assembly of the deep subsurface community (Starnawski *et al.*, 2017). The lack of  
79 adaptive evolution is likely due to the exceedingly long generation times encountered  
80 within marine sediments, and thus the limited number of generations, which limit the  
81 potential for genetic change during burial (reviewed in Jørgensen and Marshall, 2016;  
82 Lever *et al.*, 2015a).  
83 Shortest generation times have been estimated near the sediment surface, owing to the  
84 availability of freshly deposited organic matter and high potential electron acceptors  
85 (e.g. oxygen and nitrate), which collectively promote community growth and turnover  
86 (Hoehler and Jørgensen, 2013; Langerhuus *et al.*, 2012; Lomstein *et al.*, 2012).  
87 Microbial activity is further stimulated near the sediment surface due to bioturbation  
88 by benthic macrofauna. Bioturbation processes include faunal burrow construction and  
89 maintenance, both of which continually rework and irrigate the upper  $10 \pm 5$  cm of the  
90 seabed (Boudreau, 1998; Meysman *et al.*, 2006). While bioturbation occurs globally,  
91 both the intensity of bioturbation and the depth of mixing are influenced by factors such  
92 as seasonality and depth of the overlying water column (Teal *et al.*, 2008). Water depth  
93 was shown to play a minor role in driving differences in bioturbation between sites,  
94 indicating that the intensity and depth of mixing are only marginally different between  
95 coastal and deep ocean sediments. In addition to enhancing the dispersal of microbial  
96 cells, bioturbation also increases microbial energy availability by introducing labile  
97 organic matter and oxygen from the overlying water column into the seabed (Kristensen  
98 *et al.*, 2012; Kristensen and Holmer, 2001). Bioturbation has been shown to influence  
99 microbial communities near the seafloor, most notably by driving the dominance of  
100 Bacteria relative to Archaea (Chen *et al.*, 2017) that has been observed repeatedly in  
101 surface sediments (Giovannelli *et al.*, 2013; Lipp *et al.*, 2008).

102 Below the bioturbation zone, sediments exhibit a vertical geochemical zonation that  
103 results from the thermodynamically-driven succession of available electron acceptors  
104 in the sediment (Canfield et al., 1993; Froehlich et al., 1979). In organic-rich coastal  
105 marine sediments, the sulfate reduction (SR) zone occurs immediately below the  
106 bioturbation zone (Jørgensen, 1982). Here, sulfate is the main electron acceptor for  
107 microbial respiration. Below the SR zone, the sulfate-dependent anaerobic oxidation of  
108 methane takes place within a narrow zone defined as the sulfate-methane transition  
109 (SMT) (Knittel and Boetius, 2009; Leloup et al., 2007; Thomsen et al., 2001). Each  
110 biogeochemical process is mediated by a unique guild of terminal oxidizers, such as  
111 sulfate-reducing microorganisms (SRM) and methanogens, respectively.

112 Analyses of subsurface microbial diversity across geochemical zones in Aarhus Bay  
113 sediments have shown that communities change most dramatically between the surface  
114 environment and the SR zone below (Chen et al., 2017; Jochum et al., 2017; Starnawski  
115 et al., 2017). Below the SR zone, a large fraction of the microbial community is more  
116 stable and persists with burial into the deep subsurface. It was therefore suggested that  
117 the assembly of subsurface communities is associated with the transition from the  
118 bioturbated surface zone of the sediment to the unmixed sediment zones below (Jochum  
119 et al. 2017; Starnawski et al. 2017). To test this hypothesis, we performed a fine-scale  
120 analysis of the distribution and activity of microbial populations present within the  
121 upper 50 cm of sediment from Aarhus Bay (Denmark). Because patterns of microbial  
122 diversity across sediment depths in Aarhus Bay are highly reproducible between  
123 sampling sites (Chen et al., 2017; Starnawski et al., 2017; Jochum et al., 2017), we  
124 chose to explore these patterns at high-resolution within sediment collected from one  
125 well-studied sampling site, station M5 (Langerhuus et al. 2012; Chen et al. 2017).

126 Sediment cores were approached as a vertical transect, with the aim of examining  
127 population dynamics associated with burial of resident microbial communities over  
128 time. Next-generation sequencing was employed to determine the distributions of  
129 bacterial and archaeal taxa (16S rRNA gene) as well as SRM, using the the gene  
130 encoding the beta subunit of the dissimilatory (bi)sulfite reductase (*dsrB*) as a marker  
131 gene (Müller et al., 2014). This approach was utilized in order to compare population  
132 dynamics of the total microbial community with a known guild of terminal oxidizers  
133 (SRM). Sequencing was coupled with quantitative PCR (qPCR) and total cell counts in  
134 order to map changes in the absolute abundances of dominant taxa at each depth.

135 Sulfate reduction rates were measured as a proxy for microbial activity and overall

136 organic carbon mineralization in the sediment and the vertical extent of the bioturbation  
137 zone was mapped by determining radionuclide distributions.

138

## 139 **2. Experimental Procedures**

140

### 141 ***Sampling***

142 A sediment core was taken by Rumohr Corer during a cruise with the *RV Aurora* in  
143 September 2014 at Aarhus Bay (Denmark) station M5 (56° 06.333'N, 10° 27.800'E;  
144 water depth 27 m). This core was used for all subsequent analyses unless otherwise  
145 noted. The sediment core was stored and sampled at 15°C, corresponding to the *in situ*  
146 temperature of the bottom water. Subsamples for DNA extractions, sulfate reduction  
147 rate measurements, and cell counts were collected with sterile, pre-cut 2.5 ml syringes  
148 from the intact core. Samples were taken in 1 cm increments from the top down to  
149 40 cm, with three additional deeper reference samples at 45, 48 and 50 cm depth.

150 In order to assess the reproducibility of our results across multiple cores and sampling  
151 times, we took four additional Rumohr cores from site M5 in both 2017 and 2018. The  
152 processing and analysis of these cores is described in the Supplementary Material.

153

### 154 ***Sulfate reduction rates (SRR)***

155 SRR were determined in 1 cm intervals using the <sup>35</sup>S-tracer technique (Røy et al. 2014).  
156 Subsamples of 2.0 cm<sup>3</sup> were taken with cut-off syringes that had been covered with  
157 Parafilm® and inserted cut-side down into anoxic marine sediment to prevent the  
158 samples from becoming oxygenated during processing. 0.5 cm<sup>3</sup> of sediment from each  
159 subsample was transferred into a microcentrifuge tube and pelleted by centrifugation.  
160 The supernatant was collected and used to measure the sulfate concentration in the pore  
161 water by Ion Chromatography (Dionex IC 2000, Thermo Scientific, Dreieich,  
162 Germany). The remaining sediment was injected with 10 µl of <sup>35</sup>S-SO<sub>4</sub><sup>2-</sup> radiotracer (20  
163 kBq µl<sup>-1</sup>) and incubated for 5 h in the dark at 15°C under anoxic conditions. To stop the  
164 incubations, the samples were transferred into 5 ml of 20 % Zn-acetate solution and  
165 stored at -20°C. Total reduced inorganic sulfur was separated from sulfate and reduced  
166 to sulfide by the cold chromium distillation procedure (Kallmeyer *et al.*, 2004 with  
167 modifications by Røy *et al.* 2014). The radioactivity was measured on a Packard Tri-  
168 Carb 2900 TR Liquid Scintillation Analyzer (PerkinElmer, Waltham, MA). Blanks  
169 consisting of sediment killed with 20 % Zn-acetate prior to radiotracer injection were

170 measured in parallel. The background radioactivity of the equipment and reagents was  
171 tested using samples containing only 5 ml Zn-acetate and Ecoscint XR (BioNordika,  
172 Herlev, Denmark). SRR were calculated according to Jørgensen (1978).

173

#### 174 ***Distribution of $^{210}\text{Pb}$ (excess) and $^{137}\text{Cs}$***

175 Sediment samples for determination of  $^{210}\text{Pb}$ ,  $^{226}\text{Ra}$ ,  $^{137}\text{Cs}$ , and  $^{40}\text{K}$  distributions were  
176 derived from a separate, 51 cm long core collected from station M5 in April 2016. The  
177 core was extruded from the liner and cut into 1 cm sections. The sections were dried at  
178  $105^\circ\text{C}$  for 2 days, finely ground, and precisely weighed into polysulfone screw-top  
179 containers with approximately 20 g of sediment per sample. The samples were sealed  
180 with electrical tape and stored for 20 days to allow  $^{222}\text{Rn}$  ingrowth to secular  
181 equilibrium before counting. The radioactivities of  $^{210}\text{Pb}$  (46.5 keV),  $^{214}\text{Pb}$  (295 and  
182 352 keV),  $^{214}\text{Bi}$  (609 keV),  $^{137}\text{Cs}$  (662 keV) and  $^{40}\text{K}$  (1405 keV) were then measured  
183 by low-level gamma-spectroscopy (Eurysis Ge Coaxial Type N detector, Canberra  
184 Industries, Rüsselsheim, Germany). A detector efficiency-energy curve was calibrated  
185 using a certified reference U-Th ore (Canmet DL-1a) and laboratory grade KCl (for  
186  $^{40}\text{K}$ ). Sediment self-absorption at 45.5 keV was corrected according to the method of  
187 Cutshall *et al.*, (1983). The activity of  $^{210}\text{Pb}$  supported by the sediment's natural  
188 contents of daughters of the  $^{238}\text{U}$  decay chain was estimated from the activity of  $^{226}\text{Ra}$ .  
189  $^{226}\text{Ra}$  was estimated from daughter nuclide activities of  $^{214}\text{Pb}$  (295 and 352 keV),  $^{214}\text{Bi}$   
190 (609 keV), assuming secular equilibrium between  $^{226}\text{Ra}$ ,  $^{222}\text{Rn}$ ,  $^{214}\text{Bi}$  and  $^{214}\text{Pb}$ .  $^{226}\text{Ra}$ -  
191 supported  $^{210}\text{Pb}$  was then subtracted from the total  $^{210}\text{Pb}$  activity to estimate the excess  
192  $^{210}\text{Pb}$  derived via deposition.

193

#### 194 ***Calculation of bioturbation***

195 A numerical model was set up to calculate the magnitude of sediment mixing by reverse  
196 modeling of the distributions of  $^{137}\text{Cs}$  and excess  $^{210}\text{Pb}$  in the upper 36 cm of sediment.  
197 A constant flux of  $^{210}\text{Pb}$ , corresponding to the depth-integrated rate of measured excess  
198  $^{210}\text{Pb}$  activity, was imposed across the sediment surface. During runtime  $^{210}\text{Pb}$  was  
199 allowed to decay with a half-life of 22.3 years. Sedimentation was simulated by  
200 imposing downwards advection at  $0.96 \text{ mm year}^{-1}$  according to the mean sedimentation  
201 rate at station M5 (derived from  $^{14}\text{C}$  age determination of bivalve shells, Langerhuus *et*  
202 *al.*, 2012). The model was divided into two depth-domains with independently  
203 controlled rates of bioturbation to simulate the distinct change in bioturbation between

204 the upper  $5.75 \pm 5.67$  cm “mixed zone” and the deeper sediment (Teal et al., 2008). The  
205 model was allowed to run until steady state. The division-depth between the upper and  
206 the lower zone, and the rate of mixing in the two zones, were then adjusted iteratively  
207 to give the best fit to the measured distribution of excess  $^{210}\text{Pb}$  activity.

208 A second iteration of the model was initiated with one unit of  $^{137}\text{Cs}$  in the upper one  
209 mm of the sediment, simulating the deposition of fall-out from the Chernobyl nuclear  
210 accident.  $^{137}\text{Cs}$  was then allowed to decay with a half-life of 30.17 years and allowed  
211 to move by the same bio-diffusion and convection as  $^{210}\text{Pb}$ . This iteration of the model  
212 was run for 29 years, corresponding to the time from the Chernobyl nuclear accident in  
213 April 1986 to the sediment core collection in April 2016. The rates of bioturbation in  
214 the two depth-zones were again adjusted iteratively to simultaneously achieve the best  
215 steady-state simulation of the measured depth-distributions of  $^{210}\text{Pb}$  and the best  
216 transient distribution of  $^{137}\text{Cs}$  activity. The model was implemented in Comsol  
217 Multiphysics.

218

#### 219 ***Total cell counts (TCC)***

220 Sediment subsamples of 1 mL were preserved 1:2 (v/v) in 4 % Paraformaldehyde (w/v)  
221 and stored at 4°C until further processing. The fixed samples were homogenized and  
222 cells detached from sediment particles according to the protocol by Lavergne *et al.*  
223 (2014). The cells were stained with SYBR Gold (1  $\mu\text{l}$  10,000X in 10 ml 1X PBS) and  
224 4,6-diamidino-2-phenylindole (DAPI) (1  $\mu\text{g ml}^{-1}$ ) and analyzed by epifluorescence  
225 microscopy (Zeiss Axiovert 200, Zeiss, Jena, Germany).

226

#### 227 ***DNA extractions***

228 Sediment subsamples for DNA extraction were stored at -80°C prior to processing. To  
229 avoid contamination from the sampling equipment, sediment that was in contact with  
230 the core liner was discarded. Approximately 0.2 g of sediment was used for each DNA  
231 extraction, which included an initial washing step to remove extracellular DNA (Lever  
232 et al., 2015b). After washing, cells were lysed by enzymatic treatments (Kjeldsen et al.,  
233 2007) followed by incubation at 65°C for 2 hours in 2% sodium dodecyl sulfate. At  
234 this point, the DNA was extracted using the FastDNA Spin Kit for Soil (MP  
235 Biomedicals, Holte, Denmark) according to the manufacturer’s instructions.

236

237 ***Quantification of 16S rRNA and dsrB genes***

238 Bacterial and archaeal 16S rRNA genes were quantified by qPCR according to  
239 Starnawski *et al.* (2017) using the primer pairs Bac908F/Bac1075R (Ohkuma and  
240 Kudo, 1998) and Arch915Fmod/Arch1059R (Cadillo-Quiroz *et al.*, 2006), respectively.  
241 SRM abundance was estimated by qPCR of the *dsrB* gene as described by Jochum *et*  
242 *al.* (2017). DNA extraction efficiency was calculated by comparing TCC to 16S rRNA  
243 gene copy numbers generated from qPCR, assuming that bacteria and archaea on  
244 average harbor 4.1 and 1.6 16S rRNA gene copies cell<sup>-1</sup>, respectively (Stoddard *et al.*,  
245 2015). Using this approach, we estimated an average DNA extraction efficiency of 7%  
246 for all depths.

247

248 ***Ion Torrent PGM sequencing and analysis***

249 The bacterial and archaeal 16S rRNA genes were amplified using the primer pair  
250 Univ519F/Univ802R (Wang and Qian, 2009). The resulting ~283-bp long fragment  
251 was barcoded and sequenced on an Ion Torrent PGM using 300 bp chemistry (Life  
252 Technologies, Carlsbad, CA). Amplification, sequencing, and sequence analysis of the  
253 16S rRNA gene were all done according to Starnawski *et al.* (2017). Reads were  
254 clustered into operational taxonomic units (OTUs) with a 97% similarity cutoff using  
255 the UPARSE-OTU algorithm implemented in the usearch v7.0.959\_i86osx32 software  
256 (Edgar, 2013). Representative sequences of each of the 2431 OTUs identified by 16S  
257 rRNA gene sequencing were deposited in GenBank under accession numbers  
258 MG637451 - MG639881.

259 *DsrB* sequencing was performed according to Jochum *et al.* (2017) using the primer  
260 variant mixtures dsrB-F1a-h and dsrB-4RSIIa-f (Lever, 2013). The resultant *dsrB*  
261 sequence libraries were filtered and analyzed using the pipeline described in Jochum *et*  
262 *al.* (2017). Species-level OTUs were clustered at a 90% similarity cutoff using  
263 pick\_otus.py from the QIIME package (Caporaso *et al.*, 2010). The taxonomic identity  
264 of SRM was resolved by classifying translations of quality-filtered reads according to  
265 the taxonomic framework proposed by Müller *et al.* (2014), with modifications and  
266 procedures described by Jochum *et al.* (2017). Representative OTU sequences were  
267 deposited in GenBank under the accession numbers MG742726 – MG744217.

268 The classified OTUs were transferred to the R statistical environment (Version 3.4.2),  
269 where all additional analyses were performed. Non-metric multidimensional scaling  
270 (NMDS) ordinations were calculated on the OTU level, both for the total microbial



271 community and the SRM community. Prior to ordination, the OTU abundance tables  
272 were randomly subsampled to even sequencing depth using the `rarefy_even_depth`  
273 function in the `phyloseq` package (McMurdie and Holmes, 2013). The NMDS  
274 coordinates were calculated from the subsampled datasets using the `metaMDS` function  
275 implemented in the `vegan` package (Oksanen et al., 2017).

276

### 277 *Estimates of biomass turnover times*

278 SRR measurements were combined with qPCR data to estimate per-cell metabolic rates  
279 (csSRR) and microbial biomass turnover times. For these calculations, *dsrB* gene copy  
280 numbers were used to estimate the abundance of SRM, assuming one *dsrB* gene per  
281 genome and a DNA extraction efficiency of 7% (Wagner et al., 2005). Biomass  
282 turnover times ( $T_b$ ) were estimated by dividing the biomass present within a given depth  
283 by the rate of biomass production. The biomass was calculated by multiplying the  
284 number of SRM (cells per g sediment) with the amount of carbon contained within a  
285 single cell (assuming an average cellular carbon content of 21.5 fg C per cell as  
286 empirically determined for subseafloor cell populations (Braun et al., 2016)). The rate  
287 of production was calculated from the measured SRR ( $\text{nmol g}^{-1} \text{ sediment d}^{-1}$ ) and an  
288 estimated growth yield (8% according to D'Hondt *et al.* (2014)), assuming 2 moles of  
289 organic carbon oxidized per mole of sulfate reduced. The cumulative generation times  
290 per depth interval were calculated using an estimated sedimentation rate of 0.96 mm  
291  $\text{year}^{-1}$  (Langerhuus et al., 2012).

292

## 293 **3. Results**

294

### 295 *Geochemistry and microbial activity*

296 Pore water sulfate concentrations at site M5 decreased steeply with sediment depth  
297 from ~27 mM at 3 cm below seafloor (cmbsf) to ~2 mM at the deepest analyzed coring  
298 depth of 50 cmbsf (Figure 1a). Alignment of the sulfate concentrations with a methane  
299 profile taken previously from the same site revealed a sulfate methane transition (SMT)  
300 between 45 and 55 cmbsf. The sulfate and methane profiles were reproduced in the  
301 cores taken in 2017 and 2018, indicating that the geochemical conditions at site M5 are  
302 stable over time (Figure S6). Maximum rates of sulfate reduction ( $177 - 218 \text{ nmol cm}^{-3}$   
303  $\text{d}^{-1}$ ) occurred at 1-3 cmbsf (Figure 1b). Below 3 cmbsf, the SRR dropped steeply with

304 depth, reaching  $\sim 0.4 \text{ nmol cm}^{-3} \text{ d}^{-1}$  at 50 cmbsf. Much like the sulfate and methane  
305 profiles, this pattern was highly reproducible across years (Figure S6).

306

### 307 *Sediment mixing*

308 According to measurements of excess  $^{210}\text{Pb}$  and  $^{137}\text{Cs}$  activity a region of intense  
309 mixing is present from 0-6 cmbsf (Figure 1). Below this depth range,  $^{210}\text{Pb}$  activity  
310 dropped logarithmically, but penetrated deeper than what would be expected from the  
311 balance between burial and decay. The effects of mixing were even more evident with  
312  $^{137}\text{Cs}$  originating from the Chernobyl nuclear accident, which should be found as a  
313 distinct peak at 2.3 cm below the sediment surface in the absence of sediment mixing  
314 (Moros et al., 2017). Mixing in the upper 6 cm alone would increase penetration to  
315 maximum 8.3 cm, but the radioisotope was present at least to 20 cmbsf. Reverse  
316 modeling of the depth distribution of  $^{210}\text{Pb}$  and  $^{137}\text{Cs}$  suggested a bio-diffusion  
317 coefficient of at least  $10^{-2} \text{ m}^2 \text{ year}^{-1}$  in the upper 6 cm, and near  $4 \times 10^{-5} \text{ m}^2 \text{ year}^{-1}$  in the  
318 zone between 6 and 35 cmbsf.

319

### 320 *Vertical distribution of Bacteria and Archaea*

321 TCC and qPCR data showed a sharp drop in microbial abundance between the sediment  
322 surface and the bottom of the zone of more intense bioturbation (0-6 cmbsf) referred to  
323 as the “bioturbation zone” below (Figure 2). Within this region, TCC dropped by 65%,  
324 while bacterial and archaeal 16S rRNA gene copy numbers dropped by 86% and 70%,  
325 respectively. 16S rRNA gene copy numbers followed the same distribution exhibited  
326 by TCC, but with lower abundances (Figure 2).

327 Non-metric multidimensional scaling (NMDS) ordination of 16S rRNA gene sequence  
328 OTU distributions revealed that the most pronounced change in OTU composition  
329 occurred between 3 and 7 cmbsf, corresponding exactly to the bottom of the  
330 bioturbation zone (Figure 3a). Below the bioturbation zone samples clustered together,  
331 indicating that they harbored more similar communities when compared to the  
332 communities present within the bioturbation zone. Samples assigned to the subsurface  
333 (SR, 7-36 cmbsf) and the bottom of the core (SMT, 48-50 cmbsf) also clustered  
334 together, suggesting that the composition of the microbial community below the  
335 bioturbation zone is relatively stable and changes only gradually with depth (Figure  
336 3a).

337 Proteobacteria sequences were negatively associated with depth (Spearman,  $r = -0.73$ ,  
338  $P < 0.001$ ) and dropped in relative abundance from 60% in the bioturbation zone to  
339 30% at 7-8 cmbsf and 18% at 50 cmbsf (Figure 3b). The drop in Proteobacteria  
340 sequences was primarily driven by sequences belonging to the Gammaproteobacteria,  
341 which dropped from 30% in the bioturbation zone to 1-10% in the subsurface below  
342 (Supplementary, Figure S1).

343 In contrast to the Proteobacteria, sequences clustering within the Chloroflexi were  
344 positively associated with depth (Spearman,  $r = 0.57$ ,  $P < 0.01$ ) and increased in relative  
345 abundance from 3% at 3 cmbsf to 16% at 8 cmbsf (Figure 3b). The increase in relative  
346 abundance of Chloroflexi was primarily driven by OTUs belonging to the class  
347 Dehalococcoidia, which increased from <1% of total sequencing reads in the surface to  
348 12% at 50 cmbsf (Supplementary, Figure S1). A similar positive correlation with depth  
349 was observed for sequences clustering within the Atribacteria (Spearman,  $r = 0.84$ ,  $P <$   
350  $0.001$ ), which comprised <0.01% of total sequences in the bioturbation zone. A small  
351 community of Atribacteria began to develop immediately below the bioturbation zone  
352 (3% of total sequences at 7 cmbsf), and increased to 13% at 50 cmbsf (Figure 3b).

353 Major taxonomic shifts seen for dominant phyla were also observable on the OTU level.  
354 Mapping of the 25 most abundant OTUs at different depths throughout the core  
355 revealed a dramatic change in the OTU community composition right below the  
356 bioturbation zone (7 cmbsf), from a community dominated by Proteobacteria to more  
357 diverse high-ranking OTUs belonging to the Chloroflexi, Atribacteria, and several  
358 archaeal phyla (Supplementary, Figure S2). The OTUs that appeared right below the  
359 bioturbation zone (7-10 cmbsf) continued to increase in rank with increasing sediment  
360 depth. By 50 cmbsf, the 25 most dominant OTUs comprised 45% of the total  
361 sequencing reads, with a single Atribacteria OTU accounting for 12% of the total  
362 microbial community. Similar taxonomic shifts within bacterial phyla were also seen  
363 in the cores taken from 2017, including a marked increase in the relative abundances of  
364 Atribacteria and Chloroflexi occurring between 5 and 10 cmbsf (Figure S7A). Our  
365 separate analyses of archaeal lineages from the cores taken in 2018 also show changes  
366 in the archaeal community across depths (Figure S7B). Most notably we see an increase  
367 in the relative abundance of Lokiarchaeia with depth, a class within the newly  
368 characterized Asgardaeota phylum (Spang et al., 2015; Zaremba-Niedzwiedzka et al.,  
369 2017). There is also a stark decrease in the relative abundance of Thaumarchaeota,  
370 specifically the class Nitrososphaeria, with increasing depth.

371 In a separate analysis, we traced OTUs across depths in order to identify OTUs from  
372 the surface that persisted to the bottom of the core (Supplementary, Figure S3). This  
373 revealed 92 OTUs that were present in every sequenced depth, from the bioturbation  
374 zone to 50 cmbsf. While this set of persisting OTUs represented only 12% of the total  
375 OTU richness at 50 cmbsf, they comprised 45% of the total sequencing reads (Figure  
376 S3). By converting OTU relative abundances to absolute abundances using qPCR data  
377 (Starnawski et al., 2017), we found that several OTUs also increased in absolute  
378 abundance with depth, running counter to the drop in absolute abundance observed for  
379 the total microbial community and the majority of dominant surface OTUs (Figure 4).  
380 The OTUs which increased in absolute abundance with depth (Supplementary Table 1)  
381 belong to common subsurface lineages such as the Atribacteria and members of the  
382 class Phycisphaerae, both of which have been found to constitute a significant portion  
383 of the microbial community hundreds of meters below the seafloor (Petro et al., 2017).

384

### 385 ***Vertical distribution of sulfate reducing microorganisms (SRM)***

386 Both qPCR and sequencing analysis of *dsrB* genes indicated that SRM were present  
387 throughout the entire depth profile (Figures 2 & 3d). *DsrB* gene copy numbers equated  
388 to 5-30% of the 16S rRNA gene copy numbers, with the highest relative abundance  
389 occurring within the bioturbation zone (Figure 2). The *dsrB* gene copy number showed  
390 a strong positive correlation to the sulfate reduction rate ( $R^2 = 0.86$ ,  $P < 0.001$ ; Figure  
391 S4), highlighting *dsrB* gene quantification as a means to estimate SRM abundance.  
392 Furthermore, the depth-associated pattern of *dsrB* gene copy numbers could be  
393 reproduced in cores sampled in 2017 and 2018 (Figure S8).

394 Sequencing analysis of the *dsrB* gene grouped the OTUs into 44 different lineages.  
395 NMDS ordination of the OTUs revealed a marked change in community composition  
396 between the bioturbated samples and the subsurface below, producing a similar pattern  
397 as was seen for the total community (Figure 3c). The surface samples were dominated  
398 by OTUs classified as Uncultured Desulfobacteraceae lineage A (Jochum et al., 2017)  
399 and Syntrophobacteraceae-like DsrAB, which collectively comprised nearly 60% of the  
400 total sequences at 3 cmbsf (Figure 3d). While the relative abundances of these lineages  
401 decreased with depth, OTUs belonging to the Aarhus Bay lineage (Jochum et al., 2017)  
402 and the Uncultured Desulfobacteraceae lineage F (Jochum et al., 2017) became  
403 increasingly dominant downcore (Figure 3d). OTUs classified within the Aarhus Bay  
404 lineage comprised less than 0.01% of sequencing reads within the bioturbation zone,

405 but increased to nearly 40% of the total sequencing reads at the bottom of the core  
406 (Figure 3d).

407 Absolute abundance estimates were calculated for each lineage by multiplying *dsrB*  
408 gene copy numbers by relative sequence abundances, assuming one copy of the gene  
409 per cell (Wagner et al., 2005). Figure 5 displays the three most prominent depth-  
410 associated trends in absolute abundances amongst the different lineages. Among these,  
411 we observed a marked drop in the abundance of OTUs belonging to the Uncultured  
412 Desulfobacteraceae lineage A, which declined by nearly one order of magnitude  
413 between the sediment surface and 7 cmbsf. This was a common trend for other  
414 predominant lineages, with substantial decreases in population size occurring for 8 out  
415 of the 15 most abundant SRM lineages (Supplementary, Figure S5). This steep drop in  
416 population sizes occurred in parallel to the rapid population growth of the  
417 Desulfobacteraceae lineage F, which took over as the dominant lineage below the  
418 bioturbation zone. This lineage was depleted again near the bottom of the SR zone (26-  
419 48 cmbsf), reaching a minimum abundance of  $1.4 \times 10^6$  (gene copies  $g^{-1}$  sediment).  
420 Within the same depth interval, members of the Aarhus Bay lineage became  
421 quantitatively dominant, reaching a maximum abundance of  $2.1 \times 10^6$  (gene copies  $g^{-1}$   
422 sediment) at 50 cmbsf. (Figure 5).

423

#### 424 ***Cell-specific SRR and community turnover***

425 Measurements of SRR and SRM abundance were used to estimate mean cell-specific  
426 metabolic rates (csSRR) throughout the core. The abundance of the total SRM  
427 community was estimated by dividing *dsrB* gene copy numbers by 7%, corresponding  
428 to the calculated DNA extraction efficiency. The csSRR were highest at the sediment  
429 surface, peaking at  $0.07 \text{ fmol cell}^{-1} \text{ day}^{-1}$  at 3 cmbsf, and then decreasing towards a  
430 more constant value at 30-50 cmbsf (Figure 6a). This pattern was reproduced by  
431 samples taken across broader depth intervals in 2017 and 2018, indicating that  
432 microbial activity in the system is relatively stable over years (Figure S6).

433 Rates of SR were then used to calculate the amount of time required for complete  
434 turnover of SRM biomass ( $T_b$ ) within a given depth interval. Turnover times increased  
435 with depth below the bioturbation zone (Figure 6b), with an average value of  $6 \pm 4$   
436 years. Biomass turnover times were used to generate a profile of the number of  
437 cumulative generations that a community could undergo during burial (Figure 6c). The  
438 resulting profile indicated that a large fraction of possible generations within the depth

439 profile could occur within the uppermost centimeters of the sediment column. Once  
440 buried below the bioturbation zone, the community would have undergone over 40%  
441 of the total generations possible within the 50 cm depth interval.

442

#### 443 **4. Discussion**

444

##### 445 *The influence of bioturbation on community assembly*

446 Four processes—diversification, dispersal, selection, and drift, have been proposed as  
447 major drivers of microbial community assembly (Nemergut et al., 2013). These  
448 processes have been examined within the context of the marine subsurface  
449 environment, suggesting that subsurface microbial communities predominantly  
450 assemble by selective survival of buried taxa (Jochum et al., 2017; Petro et al., 2017;  
451 Starnawski et al., 2017). Genetic diversification is limited from the sediment surface  
452 down to 2 mbsf, suggesting that microbial communities do not undergo adaptive  
453 evolution during burial (Starnawski et al., 2017). This lack of apparent evolution in the  
454 seabed is expected to be due to exceedingly long generation times which increase with  
455 sediment depth and age (Hoehler and Jørgensen, 2013; Jørgensen and Marshall, 2016;  
456 Lever et al., 2015a; Røy et al., 2012). Our estimates of microbial activity and biomass  
457 turnover show that the highest rates of activity, and likewise the fastest biomass  
458 turnover times, occur within the most heavily bioturbated surface layer (1-6 cmbsf) of  
459 Aarhus Bay sediments. As communities are buried below the bioturbation zone,  
460 biomass turnover times increase steadily, limiting the number of possible generations  
461 and likewise the potential for genetic diversification (Figure 6). Due to the lack of  
462 diversification even over longer depth intervals (Starnawski et al., 2017), it would seem  
463 that the greatest scope for adaptive evolution in the seabed occurs within the uppermost  
464 6 cm of the sediment column of Aarhus Bay. The occurrence of relatively high activities  
465 and community generations within the bioturbation zone can be explained by  
466 macrofaunal reworking, which introduces labile organic matter from overlying water  
467 and the seafloor into deeper sediment layers (Chen et al., 2017; Kristensen and Holmer,  
468 2001; Kristensen and Kostka, 2013). Bioirrigation of sediment during burrowing,  
469 feeding, and respiration can further stimulate organic matter degradation by introducing  
470 high potential electron acceptors into the sediment (Aller and Aller, 1998).

471 Much like diversification, the influence of dispersal, or the movement of microbial cells  
472 in space, may be higher within the bioturbation zone than the subsurface below. The

473 potential for passive dispersal was especially pronounced within the uppermost 6 cm  
474 of the sediment, due to homogenizing mixing by macrofauna (Figure 1). Below the  
475 bioturbation zone, mixing decreases by at least two orders of magnitude. When  
476 conditions conducive to passive transport largely cease and community turnover is  
477 diminished, selection caused by fitness differences between taxa (Nemergut et al.,  
478 2013) is likely to take over as the predominant means of assembly.

479 Our high depth resolution datasets including a mapping of the extent of bioturbation  
480 provides direct evidence that stark changes in microbial abundance and community  
481 structure occurs exactly at the bottom of the bioturbation zone (Fig. 1-3). As discussed  
482 in detail below, our results thus confirm the hypothesis that this is where the subsurface  
483 microbial community assembles in the sediment. This can be explained by a shift in the  
484 selection regime—from fast growth and adaptation to dynamic conditions (including  
485 exposure to O<sub>2</sub>) within the mixed surface, to survival under energetic limitations in the  
486 subsurface below. This change causes an increase in the relative abundances of taxa  
487 which have been found to predominate in much deeper sediments, where rates of  
488 biomass turnover may approach hundreds to thousands of years (Hoehler and  
489 Jørgensen, 2013; Jørgensen and Marshall, 2016; Parkes et al., 2000, 2014). In  
490 agreement, selection has been previously implicated as a major driver of microbial  
491 community assembly in the subsurface, first in aquifers (Stegen et al., 2013), and more  
492 recently in marine sediments (Jochum et al., 2017; Petro et al., 2017; Starnawski et al.,  
493 2017; Walsh et al., 2015). Here we see that selection for taxa adapted to energetic  
494 limitations begins already centimeters below the sediment surface, as the community  
495 becomes buried underneath the more dynamic and energy-rich bioturbation zone.  
496 While the most marked difference in community composition occurs between the  
497 bioturbated samples and the subsurface below (7 cmbsf), there is still variability in the  
498 composition of samples from 7-50 cmbsf (Figure 3). These differences suggest that the  
499 deep community is not yet fully assembled, and that gradual population changes are  
500 likely to continue to occur throughout the entirety of the sediment column.

501

### 502 ***Influence of geochemical zonation***

503 The distributions of abundant SRM lineages were indicative of a response to  
504 geochemical zonation, with major shifts in abundances occurring at the onset and end  
505 of the SR zone (Figure 5). The lineages that increased in absolute abundance within the  
506 SR zone maintained relatively constant abundances throughout the entirety of this

507 region, with gene copy numbers dropping upon transition into the SMT. Apparent  
508 responses to geochemical zonation were especially pronounced for Uncultured  
509 Desulfobacteraceae lineage F and the Aarhus Bay lineage—both of which have been  
510 found previously to dominate the SRM community below the sediment surface and  
511 down into the methanogenesis zone (Jochum *et al.*, 2017). The vertical stratification of  
512 SRM taxa has been demonstrated previously in coastal sediments (Sahm *et al.*, 1999),  
513 biofilms (Ramsing *et al.*, 1993), and marine Arctic sediments (Ravenschlag *et al.*,  
514 2000). These observations can be explained by an adaptation of certain lineages to  
515 specific geochemical conditions, allowing them to become dominant within a given  
516 depth interval (Jorgensen *et al.*, 2012). The assumption that community dynamics are  
517 reflective of different ecological niches among the lineages is further supported by the  
518 measured SRR, which reach maximum rates at 3 cmbsf (Figure 1b). This delay, which  
519 is indicative of the competitive inhibition of dissimilatory sulfate reduction by Mn and  
520 Fe reductive processes (Canfield *et al.*, 1993; Thamdrup *et al.*, 1994), suggests that  
521 sulfate reduction is not the predominant terminal degradation process in the top 1-2 cm  
522 of the sediment. The geochemical succession of specialized populations is nicely  
523 illustrated by the *dsrB* sequence dataset, which shows that the dying off of dominant  
524 taxa within the uppermost 1-3 cm depth interval is followed by the rapid growth of  
525 lineages that subsequently take over as predominant members of the community  
526 (Figure 5).

527 While geochemical zonation thus has a hand in regulating some changes within the  
528 SRM community between depths, the overall trends for both SRM and total community  
529 appear decoupled from the geochemical zonation (Figure 3). This observation implies  
530 that the availability of energy and carbon, and not the concentration of electron  
531 acceptors such as sulfate, is the major driver for the microbial community, including  
532 also the terminal oxidizers.

533

### 534 ***Persisting sediment community***

535 Extensive molecular surveys of marine sediments have identified a unique assemblage  
536 of microorganisms, which comprise a significant portion of the deep subsurface  
537 community at geographically distinct locations (Fry *et al.*, 2008; Webster *et al.*, 2004;  
538 Teske and Sørensen, 2008; Inagaki *et al.*, 2003; Orcutt *et al.*, 2011; Walsh *et al.*, 2015).  
539 Many of these dominant taxa have been found to belong to a subset of ‘persister’  
540 microorganisms, whose relative abundances increase with sediment depth, irrespective



541 of geochemical zonation (Petro et al., 2017; Starnawski et al., 2017). Common  
542 persisting lineages within the Bacteria include the Atribacteria (Dodsworth et al., 2013;  
543 Nobu et al., 2015) or Chloroflexi, while the archaeal community is dominated by  
544 members of the Bathyarchaeota (Meng et al., 2014) and Lokiarchaeota (Inagaki et al.,  
545 2003; Spang et al., 2015; Vetriani et al., 1999). While these taxa are commonly  
546 associated with deep marine sediments, here we see that their increase in relative  
547 abundance begins just centimeters below the seafloor, right under the bioturbation zone  
548 (Figure 3). The persistence of OTUs throughout the depth profile was demonstrated by  
549 tracing OTUs across depths in the sediment (Supplementary Figure S2). A small subset  
550 (<100) of OTUs were found to persist from the surface down to 50 cmbsf, where they  
551 came to comprise >40% of the total community. Similar patterns of OTU overlap have  
552 been observed between sediments and the overlying seawater, suggesting that deep  
553 subsurface communities are comprised of rare taxa that are deposited from the water  
554 column and persist throughout burial (Walsh et al., 2015). Our estimates of the absolute  
555 abundances of dominant OTUs demonstrate that select populations may increase in  
556 absolute abundance with sediment depth (Figure 4), contrary to the drop in cell numbers  
557 seen for the total community. This suggests that persisting populations may not simply  
558 survive, but also grow, within the energy limited subsurface. While striking, this  
559 observation is based on the relative abundances of OTU sequences combined with  
560 qPCR data of the total population, and should be verified using direct quantitative  
561 methods, such as fluorescence *in situ* hybridization (FISH) or OTU-specific qPCR, in  
562 future studies.

563 While the data presented here are only collected from a single sampling site, similar  
564 patterns of microbial diversity have been observed across broader sediment depths at  
565 numerous sites within Aarhus Bay (Jochum et al., 2017; Starnawski et al., 2017). By  
566 finely resolving population dynamics near the sediment surface at site M5, we see that  
567 a marked shift in the composition of the subsurface community occurs already  
568 centimeters below the seafloor, immediately below the bioturbation zone. The taxa  
569 which persist to the bottom of the sediment core are also found in low relative  
570 abundances at the surface, suggesting that populations present within the bioturbation  
571 zone act as a seed community for the subsurface below. Replicate cores sampled in  
572 2017 and 2018 demonstrate that these depth-associated changes in the community are  
573 consistent across time. The geochemistry and rates of sulfate reduction were also stable

574 across sampling dates, indicating a consistent drop in microbial activity between the  
575 bioturbation zone and the unmixed sediment below.

576 Collectively, these results suggest that the microbial communities present within the  
577 deep biosphere in Aarhus Bay sediments begin to assemble below the bottom of the  
578 bioturbation zone, where sediment mixing and energy availability are both diminished.  
579 These changes delineate the bioturbation zone from the unmixed sediment below,  
580 where environmental selection for populations adapted to energy limitations starts to  
581 shape the microbial communities which will come to predominate within the energy-  
582 starved deep subsurface biosphere in hundreds to thousands of years.

583

584

## 585 **5. Acknowledgements**

586 We thank the crew and scientists on board of RV Aurora for help with sampling as well  
587 as Britta Poulsen, Susanne Nielsen, and Jeanette Pedersen for significant technical  
588 assistance in the laboratory. We thank Ian Marshall for providing us with a Python  
589 script used for our sequence analyses, and for helping, together with the participants of  
590 the course ‘Microbial Element Cycling and Population Ecology’, to retrieve microbial  
591 community data in 2017 and 2018.

592

## 593 **6. Funding**

594 This work was funded by the Danish National Research Foundation [n° DNRF104] and  
595 by an ERC Advanced Grant (#294200, 593 MICROENERGY) under the EU 7th FP.  
596 Additional financial support for CP and BZ was provided by the the International Max  
597 Planck Research School (IMPRS) program in Marine Microbiology (MarMiC).

598

## 599 **7. Author Contributions**

600 BJ, HR, KK, and AS designed the research. CP, BZ, and TF performed the research.  
601 CP, BZ, LJ, PS, and HR analyzed the data. CP and HR wrote the paper with input from  
602 all coauthors.

603

## 604 **8. Conflict of interest**

605 The authors declare no conflict of interest

606

607

## 608 9. References

- 609 Aller, R. C., and Aller, J. Y. (1998). The effect of biogenic irrigation intensity and  
610 solute exchange on diagenetic reaction rates in marine sediments. *J. Mar. Res.*  
611 56, 905–936. doi:10.1357/002224098321667413.
- 612 Biddle, J. F., Lipp, J. S., Lever, M. A., Lloyd, K. G., Sørensen, K. B., Anderson, R., et  
613 al. (2006). Heterotrophic Archaea dominate sedimentary subsurface ecosystems  
614 off Peru. *Proc. Natl. Acad. Sci.* 103, 3846–3851.
- 615 Boudreau, B. P. (1998). Mean mixed depth of sediments: The wherefore and the why.  
616 *Limnol. Oceanogr.* 43, 524–526. doi:10.4319/lo.1998.43.3.0524.
- 617 Braun, S., Morono, Y., Becker, K. W., Hinrichs, K. U., Kjeldsen, K. U., Jørgensen, B.  
618 B., et al. (2016). Cellular content of biomolecules in sub-seafloor microbial  
619 communities. *Geochim. Cosmochim. Acta* 188, 330–351.  
620 doi:10.1016/j.gca.2016.06.019.
- 621 Cadillo-Quiroz, H., Brauer, S., Yashiro, E., Sun, C., Yavitt, J., and Zinder, S. (2006).  
622 Vertical profiles of methanogenesis and methanogens in two contrasting acidic  
623 peatlands in central New York State, USA. *Environ. Microbiol.* 8, 1428–1440.  
624 doi:10.1111/j.1462-2920.2006.01036.x.
- 625 Callahan, B. J., McMurdie, P. J., Rosen, M. J., Han, A. W., Johnson, A. J. A., and  
626 Holmes, S. P. (2016). DADA2: High-resolution sample inference from Illumina  
627 amplicon data. *Nat. Methods* 13, 581–583. doi:10.1038/nmeth.3869.
- 628 Canfield, D. E., Thamdrup, B., and Hansen, J. W. (1993). The anaerobic degradation  
629 of organic matter in Danish coastal sediments: Iron reduction, manganese  
630 reduction, and sulfate reduction. *Geochim. Cosmochim. Acta* 57, 3867–3883.  
631 doi:10.1016/0016-7037(93)90340-3.
- 632 Caporaso, J. G., Kuczynski, J., Stombaugh, J., Bittinger, K., Bushman, F. D.,  
633 Costello, E. K., et al. (2010). QIIME allows analysis of high- throughput  
634 community sequencing data. *Nat. Methods* 7, 335–336. doi:10.1038/nmeth0510-  
635 335.
- 636 Carr, S. A., Orcutt, B. N., Mandernack, K. W., and Spear, J. R. (2015). Abundant  
637 Atribacteria in deep marine sediment from the Adélie Basin, Antarctica. *Front.*  
638 *Microbiol.* 6, 1–12. doi:10.3389/fmicb.2015.00872.
- 639 Casamayor, E. O., Massana, R., Benlloch, S., Øvreås, L., Díez, B., Goddard, V. J., et  
640 al. (2002). Changes in archaeal, bacterial and eukaryal assemblages along a  
641 salinity gradient by comparison of genetic fingerprinting methods in a multipond

- 642 solar saltern. *Environ. Microbiol.* 4, 338–348. doi:10.1046/j.1462-  
643 2920.2002.00297.x.
- 644 Chen, X., Andersen, T. J., Morono, Y., Inagaki, F., Jørgensen, B. B., and Lever, M.  
645 A. (2017). Bioturbation as a key driver behind the dominance of Bacteria over  
646 Archaea in near-surface sediment. *Sci. Rep.* 7, 2400. doi:10.1038/s41598-017-  
647 02295-x.
- 648 Cutshall, N. H., Larsen, I. L., and Olsen, C. R. (1983). Direct analysis of <sup>210</sup>Pb in  
649 sediment samples: Self-absorption corrections. *Nucl. Instruments Methods* 206,  
650 309–312. doi:10.1016/0167-5087(83)91273-5.
- 651 D’Hondt, S., Wang, G., and Spivack, A. J. (2014). “The Underground Economy  
652 (Energetic Constraints of Subseafloor Life),” in *Earth and life processes  
653 discovered from subseafloor environments* (Elsevier Inc.), 127–148.
- 654 Dodsworth, J. A., Blainey, P. C., Murugapiran, S. K., Swingley, W. D., Ross, C. A.,  
655 Tringe, S. G., et al. (2013). Single-cell and metagenomic analyses indicate a  
656 fermentative and saccharolytic lifestyle for members of the OP9 lineage. *Nat.  
657 Commun.* 4, 1810–1854. doi:10.1038/ncomms2884.
- 658 Edgar, R. C. (2013). UPARSE: highly accurate OTU sequences from microbial  
659 amplicon reads. *Nat. Methods* 10, 996–8. doi:10.1038/nmeth.2604.
- 660 Froehlich, P. N., Klinkhammer, G. P., Bender, M. L., Luedtke, N. A., Heath, G. R.,  
661 Cullen, D., et al. (1979). Early oxidation of organic matter in pelagic sediments  
662 of the eastern equatorial Atlantic: Suboxic diagenesis. 43, 1075–1090.
- 663 Fry, J. C., Parkes, R. J., Cragg, B. A., Weightman, A. J., and Webster, G. (2008).  
664 Prokaryotic biodiversity and activity in the deep subseafloor biosphere. *FEMS  
665 Microbiol. Ecol.* 66, 181–196. doi:10.1111/j.1574-6941.2008.00566.x.
- 666 Giovannelli, D., Molari, M., d’Errico, G., Baldrighi, E., Pala, C., and Manini, E.  
667 (2013). Large-Scale Distribution and Activity of Prokaryotes in Deep-Sea  
668 Surface Sediments of the Mediterranean Sea and the Adjacent Atlantic Ocean.  
669 *PLoS One* 8, 1–15. doi:10.1371/journal.pone.0072996.
- 670 Herlemann, D. P., Labrenz, M., Jürgens, K., Bertilsson, S., Waniek, J. J., and  
671 Andersson, A. F. (2011). Transitions in bacterial communities along the 2000 km  
672 salinity gradient of the Baltic Sea. *ISME J.* 5, 1571–1579.  
673 doi:10.1038/ismej.2011.41.
- 674 Hoehler, T. M., and Jørgensen, B. B. (2013). Microbial life under extreme energy  
675 limitation. *Nat. Rev. Microbiol.* 11, 83–94. doi:10.1038/nrmicro2939.

- 676 Inagaki, F., Kubo, Y., Bowles, M. W., Heuer, V. B., Ijiri, A., Imachi, H., et al. (2015).  
677 SUPPLEMENTARY - Exploring deep microbial life in coal-bearing sediment  
678 down to ~2.5 km below the ocean floor. *Science* (80-. ). 349, 420–424.  
679 doi:10.1126/science.aaa6882.
- 680 Inagaki, F., Suzuki, M., Takai, K., Oida, H., Sakamoto, T., Aoki, K., et al. (2003).  
681 Microbial Communities Associated with Geological Horizons in Coastal  
682 Subseafloor Sediments from the Sea of Okhotsk Microbial Communities  
683 Associated with Geological Horizons in Coastal Subseafloor Sediments from the  
684 Sea of Okhotsk. *Appl. Environ. Microbiol.* 69, 7224–7235.  
685 doi:10.1128/AEM.69.12.7224.
- 686 Jochum, L. M., Chen, X., Lever, M. A., Loy, A., Jørgensen, B. B., Schramm, A., et al.  
687 (2017). Depth distribution and assembly of sulfate-reducing microbial  
688 communities in marine sediments of Aarhus Bay. *Appl. Environ. Microbiol.*,  
689 AEM.01547-17. doi:10.1128/AEM.01547-17.
- 690 Jørgensen, B. B. (1982). Mineralization of organic matter in the sea bed – the role of  
691 sulphate reduction. *Nature* 296, 643–645. doi:10.1038/296643a0.
- 692 Jørgensen, B. B., and Marshall, I. P. G. (2016). Slow Microbial Life in the Seabed.  
693 *Ann. Rev. Mar. Sci.* 8, 311–332. doi:10.1146/annurev-marine-010814-015535.
- 694 Jørgensen, S. L., Hannisdal, B., Lanzén, A., Baumberger, T., and Flesland, K. (2012).  
695 Correlating microbial community profiles with geochemical data in highly strati-  
696 fied sediments from the Arctic Mid-Ocean Ridge. *Proc. Natl. Acad. Sci.* 109,  
697 16764–16765. doi:10.1594/PANGAEA.786687.
- 698 Kallmeyer, J., Ferdelman, T. G., Weber, A., Fossing, H., and Jørgensen, B. B. (2004).  
699 A cold chromium distillation procedure for radiolabeled sulfide applied to sulfate  
700 reduction measurements. *Limnol. Oceanogr.* 2, 171–180.  
701 doi:10.4319/lom.2004.2.171.
- 702 Kallmeyer, J., Pockalny, R., Ram, R., Smith, D. C., and D’Hondt, S. (2012). Global  
703 distribution of microbial abundance and biomass in subsea floor sediment. *Proc.*  
704 *Natl. Acad. Sci.* 109, 16213–16216. doi:10.1073/pnas.1203849109.
- 705 Kjeldsen, K. U., Loy, A., Jakobsen, T. F., Thomsen, T. R., Wagner, M., and  
706 Ingvorsen, K. (2007). Diversity of sulfate-reducing bacteria from an extreme  
707 hypersaline sediment, Great Salt Lake (Utah). *FEMS Microbiol. Ecol.* 60, 287–  
708 298. doi:10.1111/j.1574-6941.2007.00288.x.
- 709 Knittel, K., and Boetius, A. (2009). Anaerobic Oxidation of Methane: Progress with

- 710 an Unknown Process. *Annu. Rev. Microbiol.* 63, 311–334.  
711 doi:10.1146/annurev.micro.61.080706.093130.
- 712 Kristensen, E., and Holmer, M. (2001). Decomposition of plant materials in marine  
713 sediment exposed to different electron acceptors (O<sub>2</sub>, NO<sub>3</sub> and SO<sub>4</sub><sup>2-</sup>), with  
714 emphasis on substrate origin, degradation kinetics, and the role of bioturbation.  
715 *Geochim. Cosmochim. Acta* 65, 419–433. doi:10.1016/S0016-7037(00)00532-9.
- 716 Kristensen, E., and Kostka, J. E. (2013). Macrofaunal Burrows and Irrigation in  
717 Marine Sediment: Microbiological and Biogeochemical Interactions. *Interact.*  
718 *Between Macro- Microorg. Mar. Sediments*, 125–157.  
719 doi:10.1029/CE060p0125.
- 720 Kristensen, E., Penha-Lopes, G., Delefosse, M., Valdemarsen, T., Quintana, C. O.,  
721 and Banta, G. T. (2012). What is bioturbation? the need for a precise definition  
722 for fauna in aquatic sciences. *Mar. Ecol. Prog. Ser.* 446, 285–302.  
723 doi:10.3354/meps09506.
- 724 Kubo, K., Lloyd, K. G., Biddle, J. F., Amann, R., Teske, A., and Knittel, K. (2012).  
725 Archaea of the Miscellaneous Crenarchaeotal Group are abundant, diverse and  
726 widespread in marine sediments. *ISME J.* 6, 1949–1965.  
727 doi:10.1038/ismej.2012.37.
- 728 Langerhuus, A. T., Røy, H., Lever, M. A., Morono, Y., Inagaki, F., Jørgensen, B. B.,  
729 et al. (2012). Endospore abundance and δ<sup>15</sup>N: L-amino acid modeling of bacterial  
730 turnover in holocene marine sediment (Aarhus Bay). *Geochim. Cosmochim. Acta*  
731 99, 87–99. doi:10.1016/j.gca.2012.09.023.
- 732 Leloup, J., Fossing, H., Kohls, K., Holmkvist, L., Borowski, C., and Jørgensen, B. B.  
733 (2009). Sulfate-reducing bacteria in marine sediment (Aarhus Bay, Denmark):  
734 Abundance and diversity related to geochemical zonation. *Environ. Microbiol.*  
735 11, 1278–1291. doi:10.1111/j.1462-2920.2008.01855.x.
- 736 Leloup, J., Loy, A., Knab, N. J., Borowski, C., Wagner, M., and Jørgensen, B. B.  
737 (2007). Diversity and abundance of sulfate-reducing microorganisms in the  
738 sulfate and methane zones of a marine sediment, Black Sea. *Environ. Microbiol.*  
739 9, 131–142. doi:10.1111/j.1462-2920.2006.01122.x.
- 740 Lever, M. A. (2013). Functional gene surveys from ocean drilling expeditions - a  
741 review and perspective. *FEMS Microbiol. Ecol.* 84, 1–23. doi:10.1111/1574-  
742 6941.12051.
- 743 Lever, M. A., Rogers, K. L., Lloyd, K. G., Overmann, J., Schink, B., Thauer, R. K., et

- 744 al. (2015a). Life under extreme energy limitation: A synthesis of laboratory- and  
745 field-based investigations. *FEMS Microbiol. Rev.* 39, 688–728.  
746 doi:10.1093/femsre/fuv020.
- 747 Lever, M. A., Torti, A., Eickenbusch, P., Michaud, A. B., Šantl-Temkiv, T., and  
748 Jørgensen, B. B. (2015b). A modular method for the extraction of DNA and  
749 RNA, and the separation of DNA pools from diverse environmental sample  
750 types. *Front. Microbiol.* 6, 476. doi:10.3389/fmicb.2015.00476.
- 751 Lipp, J. S., Morono, Y., Inagaki, F., and Hinrichs, K.-U. (2008). Significant  
752 contribution of Archaea to extant biomass in marine subsurface sediments.  
753 *Nature* 454, 991–994. doi:10.1038/nature07174.
- 754 Lomstein, B. A., Langerhuus, A. T., D'Hondt, S., Jørgensen, B. B., and Spivack, A. J.  
755 (2012). Endospore abundance, microbial growth and necromass turnover in deep  
756 sub-seafloor sediment. *Nature* 484, 101–104. doi:10.1038/nature10905.
- 757 McMurdie, P. J., and Holmes, S. (2013). Phyloseq: An R Package for Reproducible  
758 Interactive Analysis and Graphics of Microbiome Census Data. *PLoS One* 8.  
759 doi:10.1371/journal.pone.0061217.
- 760 Meng, J., Xu, J., Qin, D., He, Y., Xiao, X., and Wang, F. (2014). Genetic and  
761 functional properties of uncultivated MCG archaea assessed by metagenome and  
762 gene expression analyses. *ISME J.* 8, 650–9. doi:10.1038/ismej.2013.174.
- 763 Meysman, F. J. R., Middelburg, J. J., and Heip, C. H. R. (2006). Bioturbation: a fresh  
764 look at Darwin's last idea. *Trends Ecol. Evol.* 21, 688–695.  
765 doi:10.1016/j.tree.2006.08.002.
- 766 Middelburg, J. J. (1989). A simple rate model for organic matter decomposition in  
767 marine sediments. *Geochim. Cosmochim. Acta* 53, 1577–1581.  
768 doi:10.1016/0016-7037(89)90239-1.
- 769 Moros, M., Andersen, T. J., Schulz-Bull, D., Häusler, K., Bunke, D., Snowball, I., et  
770 al. (2017). Towards an event stratigraphy for Baltic Sea sediments deposited  
771 since AD 1900: approaches and challenges. *Boreas* 46, 129–142.  
772 doi:10.1111/bor.12193.
- 773 Müller, A. L., Kjeldsen, K. U., Rattei, T., Pester, M., and Loy, A. (2014).  
774 Phylogenetic and environmental diversity of DsrAB-type dissimilatory (bi)sulfite  
775 reductases. *ISME J.* 9, 1152–65. doi:10.1038/ismej.2014.208.
- 776 Nemergut, D. R., Schmidt, S. K., Fukami, T., Neill, S. P. O., Bilinski, T. M., Stanish,  
777 L. F., et al. (2013). Patterns and Processes of Microbial Community Assembly.

- 778 *Microbiol. Mol. Biol. Rev.* 77, 342–356. doi:10.1128/MMBR.00051-12.
- 779 Nobu, M. K., Dodsworth, J. a, Murugapiran, S. K., Rinke, C., Gies, E. a, Webster, G.,  
780 et al. (2015). Phylogeny and physiology of candidate phylum ‘Atribacteria’  
781 (OP9/JS1) inferred from cultivation-independent genomics. *ISME J.*, 1–14.  
782 doi:10.1038/ismej.2015.97.
- 783 Ohkuma, M., and Kudo, T. (1998). Phylogenetic analysis of the symbiotic intestinal  
784 microfora of the termite *Cryptotermes domesticus*. 164, 389–395.
- 785 Oksanen, J., Blanchet, F. G., Friendly, M., Kindt, R., Legendre, P., Mcglinn, D., et al.  
786 (2017). *vegan: Community Ecology Package. R Packag. version 2.4-4*,  
787 <https://CRAN.R-project.org/package=vegan>. Available at:  
788 [https://github.com/vegandevs/vegan/issues%0Ahttps://github.com/vegandevs/ve](https://github.com/vegandevs/vegan/issues%0Ahttps://github.com/vegandevs/vegan)  
789 [gan](https://github.com/vegandevs/vegan).
- 790 Orcutt, B. N., Sylvan, J. B., Knab, N. J., and Edwards, K. J. (2011). Microbial  
791 ecology of the dark ocean above, at, and below the seafloor. *Microbiol. Mol.*  
792 *Biol. Rev.* 75, 361–422. doi:10.1128/MMBR.00039-10.
- 793 Parkes, R. J., Cragg, B. a, and Wellsbury, P. (2000). Recent studies on bacterial  
794 populations and processes in subseafloor sediments: A review. *Hydrogeol. J.* 8,  
795 11–28. doi:Doi 10.1007/Pl00010971.
- 796 Parkes, R. J., Cragg, B., Roussel, E., Webster, G., Weightman, A., and Sass, H.  
797 (2014). A review of prokaryotic populations and processes in sub-seafloor  
798 sediments, including biosphere: Geosphere interactions. *Mar. Geol.* 352, 409–  
799 425. doi:10.1016/j.margeo.2014.02.009.
- 800 Petro, C., Starnawski, P., Schramm, A., and Kjeldsen, K. U. (2017). Microbial  
801 community assembly in marine sediments. *Aquat. Microb. Ecol.* 79, 177–195.  
802 doi:10.3354/ame01826.
- 803 Quast, C., Pruesse, E., Yilmaz, P., Gerken, J., Schweer, T., Yarza, P., et al. (2013).  
804 The SILVA ribosomal RNA gene database project: Improved data processing  
805 and web-based tools. *Nucleic Acids Res.* 41, 590–596. doi:10.1093/nar/gks1219.
- 806 Ramsing, N. B., Kuhl, M., and Jørgensen, B. B. (1993). Distribution of Sulfate-  
807 Reducing Bacteria, O<sub>2</sub>, and H<sub>2</sub>S in Photosynthetic Biofilms Determined by  
808 Oligonucleotide Probes and Microelectrodes. *Appl. Environ. Microbiol.* 59,  
809 3840–3849.
- 810 Ravenschlag, K., Sahm, K., Knoblauch, C., Jørgensen, B., Amann, R., and Jørgensen,  
811 B. O. B. (2000). Community Structure , Cellular rRNA Content , and Activity of



- 812 Sulfate-Reducing Bacteria in Marine Arctic Sediments Community Structure ,  
813 Cellular rRNA Content , and Activity of Sulfate-Reducing Bacteria in Marine  
814 Arctic Sediments. *Appl. Environ. Microbiol.* 66, 3592–3602.  
815 doi:10.1128/AEM.66.8.3592-3602.2000.Updated.
- 816 Røy, H., Kallmeyer, J., Adhikari, R. R., Pockalny, R., Jørgensen, B. B., and D’Hondt,  
817 S. (2012). Aerobic Microbial Respiration in 86-Million-Year-Old Deep-Sea Red  
818 Clay. *Science (80-. )*. 336, 922–925. doi:10.1126/science.1219424.
- 819 Røy, H., Weber, H. S., Tarpgaard, I. H., Ferdelman, T. G., and Jørgensen, B. B.  
820 (2014). Determination of dissimilatory sulfate reduction rates in marine sediment  
821 via radioactive <sup>35</sup>S tracer. *Limnol. Oceanogr. Methods* 12, 196–211.  
822 doi:10.4319/lom.2014.12.196.
- 823 Sahm, K., Macgregor, B. J., Jørgensen, B. B., and Stahl, D. A. (1999). Sulphate  
824 reduction and vertical distribution of sulphate-reducing bacteria quantified by  
825 rRNA slot-blot hybridization in a coastal marine sediment. *Environ. Microbiol.*  
826 1, 65–74.
- 827 Spang, A., Saw, J. H., Jørgensen, S. L., Zaremba-niedzwiedzka, K., Martijn, J., Lind,  
828 A. E., et al. (2015). Complex archaea that bridge the gap between prokaryotes  
829 and eukaryotes. *Nature* 521, 173–179. doi:10.1038/nature14447.
- 830 Starnawski, P., Bataillon, T., Ettema, T. J. G., Jochum, L. M., Schreiber, L., Chen, X.,  
831 et al. (2017). Microbial community assembly and evolution in subseafloor  
832 sediment. *Proc. Natl. Acad. Sci.* 114, 2940–2945. doi:10.1073/pnas.1614190114.
- 833 Stegen, J. C., Lin, X., Fredrickson, J. K., Chen, X., Kennedy, D. W., Murray, C. J., et  
834 al. (2013). Quantifying community assembly processes and identifying features  
835 that impose them. *ISME J.* 7, 2069–79. doi:10.1038/ismej.2013.93.
- 836 Stoddard, S. F., Smith, B. J., Hein, R., Roller, B. R. K., and Schmidt, T. M. (2015).  
837 rrnDB: Improved tools for interpreting rRNA gene abundance in bacteria and  
838 archaea and a new foundation for future development. *Nucleic Acids Res.* 43,  
839 D593–D598. doi:10.1093/nar/gku1201.
- 840 Teal, L. R., Bulling, M. T., Parker, E. R., and Solan, M. (2008). Global patterns of  
841 bioturbation intensity and mixed depth of marine soft sediments. *Aquat. Biol.* 2,  
842 207–218. doi:10.3354/ab00052.
- 843 Teske, A. P. (2006). Microbial communities of deep marine subsurface sediments:  
844 Molecular and cultivation surveys. *Geomicrobiol. J.* 23, 357–368.  
845 doi:10.1080/01490450600875613.

- 846 Teske, A., and Sørensen, K. B. (2008). Uncultured archaea in deep marine subsurface  
847 sediments: have we caught them all? *ISME J.* 2, 3–18.  
848 doi:10.1038/ismej.2007.90.
- 849 Thamdrup, B., Fossing, H., and Jørgensen, B. B. (1994). Manganese, iron, and sulfur  
850 cycling in a coastal marine sediment, Aarhus Bay, Denmark. *Geochim.*  
851 *Cosmochim. Acta* 58, 5115–5129.
- 852 Thomsen, T., Finster, K., and Ramsing, N. B. (2001). Biogeochemical and molecular  
853 signatures of anaerobic methane oxidation in a marine sediment. *Appl. Environ.*  
854 *Microbiol.* 67, 1646–1656. doi:10.1128/AEM.67.4.1646.
- 855 Vergeynst, L., Kjeldsen, K. U., Lassen, P., and Rysgaard, S. (2018). Bacterial  
856 community succession and degradation patterns of hydrocarbons in seawater at  
857 low temperature. *J. Hazard. Mater.* 353, 127–134.  
858 doi:10.1016/j.jhazmat.2018.03.051.
- 859 Vetriani, C., Jannasch, H. W., Gregor, B. J. M. A. C., Stahl, D. A., and Reysenbach,  
860 A.-L. (1999). Population Structure and Phylogenetic Characterization of Marine  
861 Benthic Archaea in Deep-Sea Sediments. *Appl. Environ. Microbiol.* 65, 4375–  
862 4384.
- 863 Wagner, M., Loy, A., Klein, M., Lee, N., Ramsing, N. B., Stahl, D. A., et al. (2005).  
864 Functional marker genes for identification of sulfate-reducing prokaryotes.  
865 *Methods Enzymol.* 397, 469–489. doi:10.1016/S0076-6879(05)97029-8.
- 866 Walsh, E. A., Kirkpatrick, J. B., Pockalny, R., Sauvage, J., Spivack, A. J., Murray, R.  
867 W., et al. (2016). Relationship of Bacterial Richness to Organic Degradation  
868 Rate and Sediment Age in Subseafloor Sediment. *Appl. Environ. Microbiol.* 82,  
869 4994–4999. doi:10.1128/AEM.00809-16.Editor.
- 870 Walsh, E. A., Kirkpatrick, J. B., Rutherford, S. D., Smith, D. C., Sogin, M., and  
871 D'Hondt, S. (2015). Bacterial diversity and community composition from  
872 seafloor to subseafloor. *ISME J.*, 1–11. doi:10.1038/ismej.2015.175.
- 873 Wang, Y., and Qian, P. Y. (2009). Conservative fragments in bacterial 16S rRNA  
874 genes and primer design for 16S ribosomal DNA amplicons in metagenomic  
875 studies. *PLoS One* 4. doi:10.1371/journal.pone.0007401.
- 876 Webster, G., Parkes, R. J., Fry, J. C., Weightman, J., and Weightman, A. J. (2004).  
877 Widespread Occurrence of a Novel Division of Bacteria Identified by 16S rRNA  
878 Gene Sequences Originally Found in Deep Marine Sediments Widespread  
879 Occurrence of a Novel Division of Bacteria Identified by 16S rRNA Gene

880 Sequences Originally Found in Deep Mari. 70, 156.  
881 doi:10.1128/AEM.70.9.5708.  
882 Xiao, K. Q., Beulig, F., Kjeldsen, K. U., Jørgensen, B. B., and Risgaard-Petersen, N.  
883 (2017). Concurrent methane production and oxidation in surface sediment from  
884 Aarhus Bay, Denmark. *Front. Microbiol.* 8, 1–12.  
885 doi:10.3389/fmicb.2017.01198.  
886 Zaremba-Niedzwiedzka, K., Caceres, E., Saw, J., Bäckström, D., Juzokaite, L.,  
887 Vancaester, E., et al. (2017). Asgard archaea illuminate the origin of eukaryotic  
888 cellular complexity. *Nature* 541, 353–358. doi:10.1038/nature21031.  
889  
890

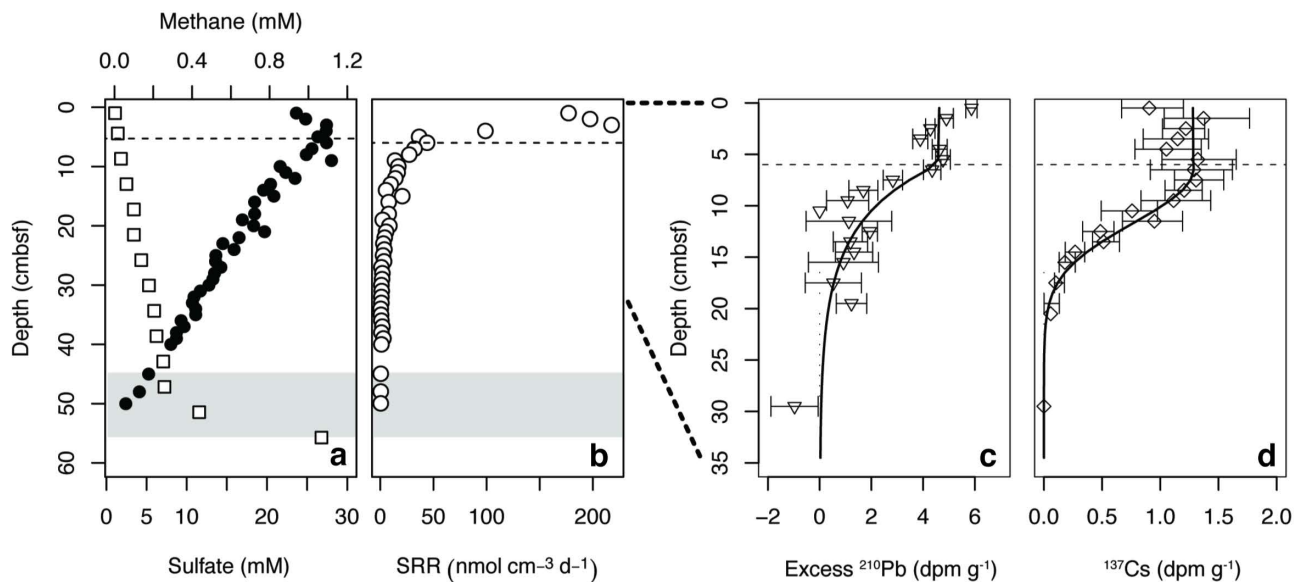

**Figure 1.** (a) Geochemical zonation of site M5, Aarhus Bay (Denmark). The sulfate profile ( $\bullet$ ) was measured in the present study, while the methane profile ( $\square$ ) was obtained from previous work at the same site (Hans Røy, unpublished). (b) Sulfate reduction rates (SRR). (c) Profile of excess  $^{210}\text{Pb}$  and (d)  $^{137}\text{Cs}$  in the surface of site M5. Error bars represent 1 sigma standard deviation of gamma counting uncertainty. Gray shading indicates the onset of the sulfate methane transition (SMT). The dashed lines indicate the bottom of the highly mixed surface layer, or bioturbation zone, based on modeling of excess  $^{210}\text{Pb}$  and  $^{137}\text{Cs}$ .

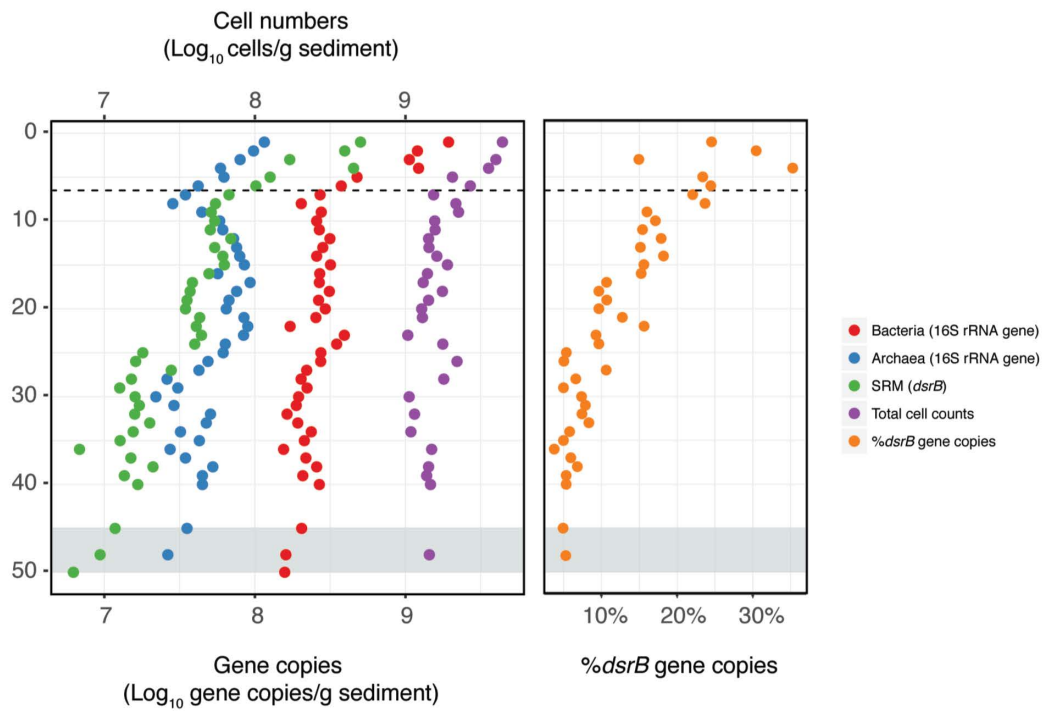

**Figure 2.** Distribution of microbial abundances with depth. Bacterial, archaeal, and sulfate reducing microorganisms (SRM) were quantified by qPCR. Total cell counts were quantified by direct epifluorescence microscopy of microbial cells. The dashed line indicates the depth of the bottom of the bioturbation zone and the gray shading indicates the onset of the sulfate methane transition (SMT).

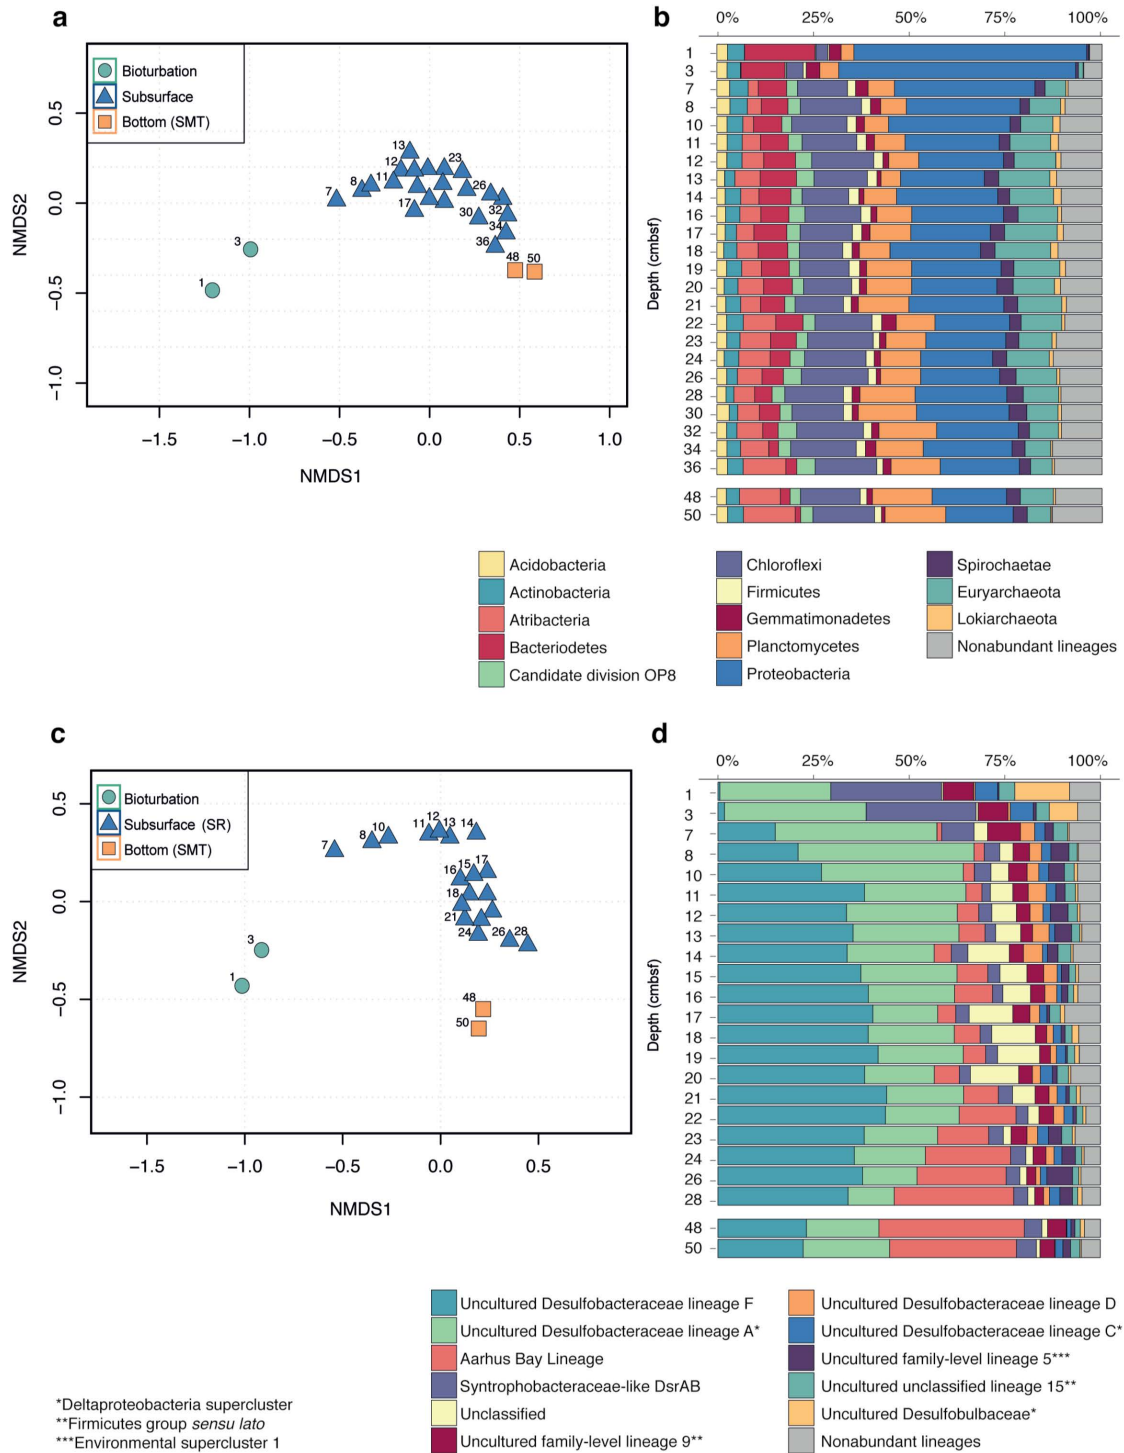

**Figure 3.** Changes in the microbial community with depth. (a & c) Non-metric multidimensional scaling (NMDS) of subsampled sequencing datasets for all Bacteria and Archaea (a) and SRM lineages (c). NMDS ordinations were calculated at the OTU level (b & d) Stacked bar plots of the relative sequence abundances for the total community (b) and the SRM lineages (d).

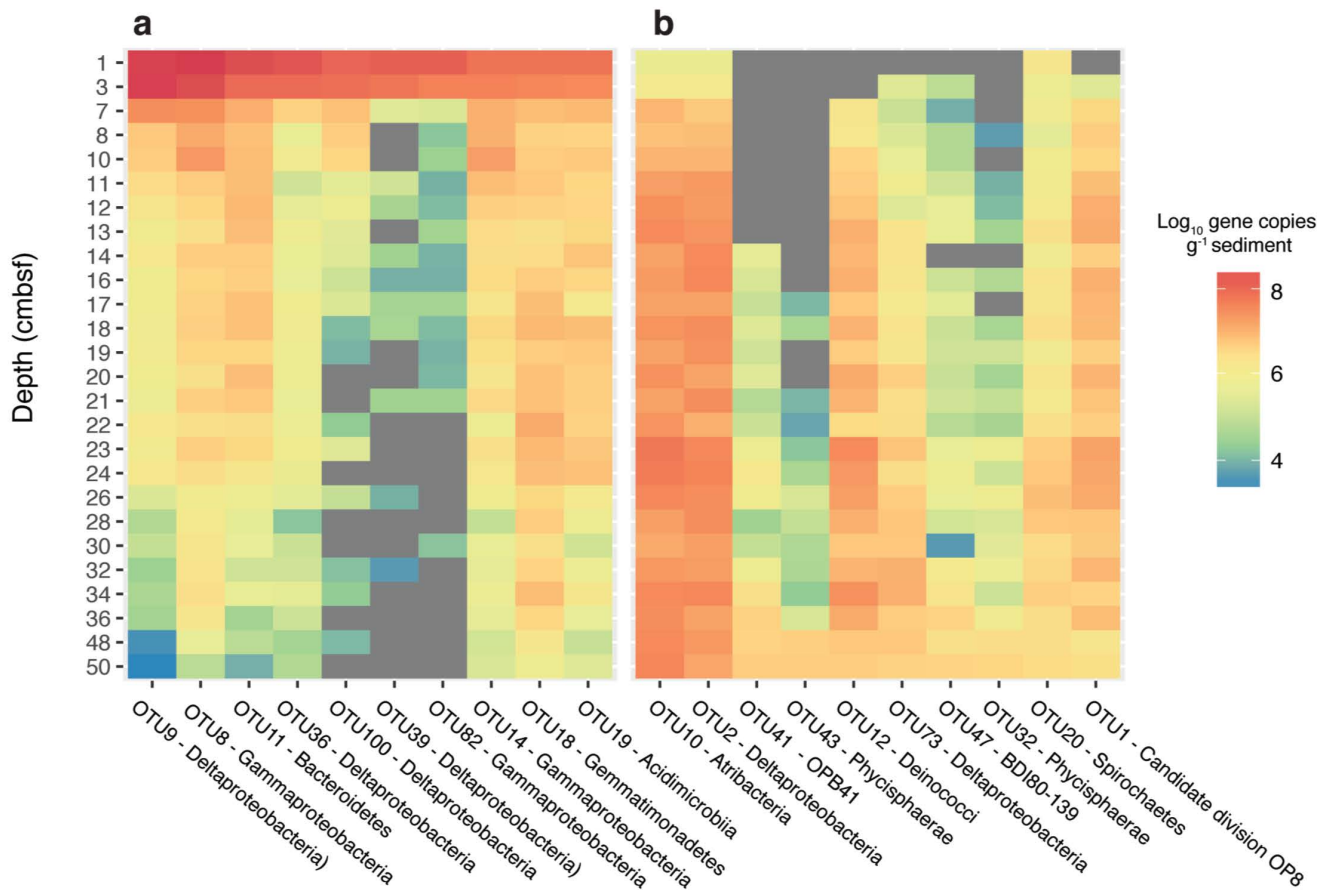

**Figure 4.** Estimated absolute abundances of the most dominant OTUs identified by sequencing of 16S rRNA gene sequencing. Absolute abundances were calculated by multiplying relative sequences abundances by gene copy numbers obtained from qPCR of the 16S rRNA gene, assuming an average of 4.1 and 1.6 16S rRNA operons per cell for bacteria and archaea, respectively. The top ten most abundant OTUs present at 3 cmbsf are displayed in (a) and the top ten most abundant OTUs present at 50 cmbsf are displayed in (b). The color represents the  $\log_{10}$  absolute abundance of each OTU. Grey areas represent depths where no sequences were recovered for the specified OTU.

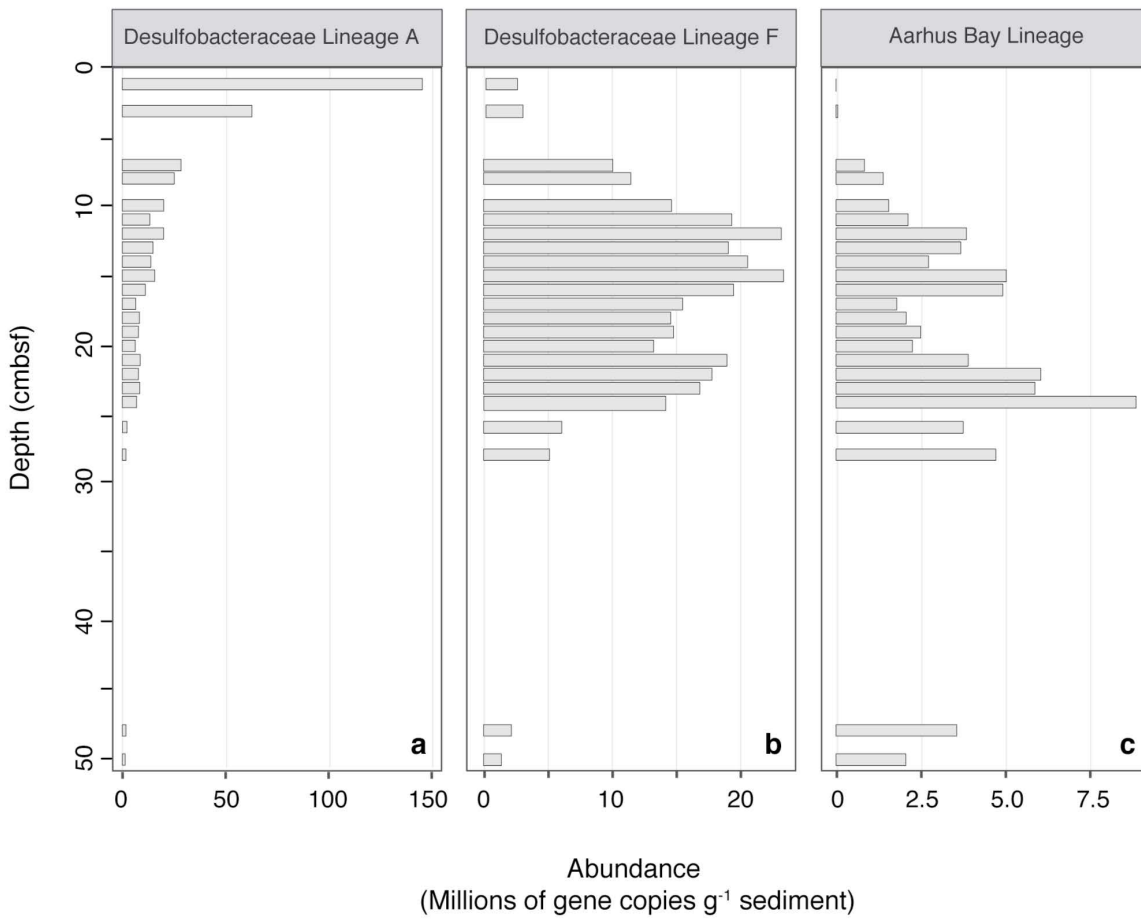

**Figure 5.** Absolute abundance profiles of SRM lineages with depth. Absolute abundances were estimated by multiplying sequence percent abundances by *dsrB* gene copy numbers, as determined by qPCR. Blank spaces indicate a lack of sequencing data.



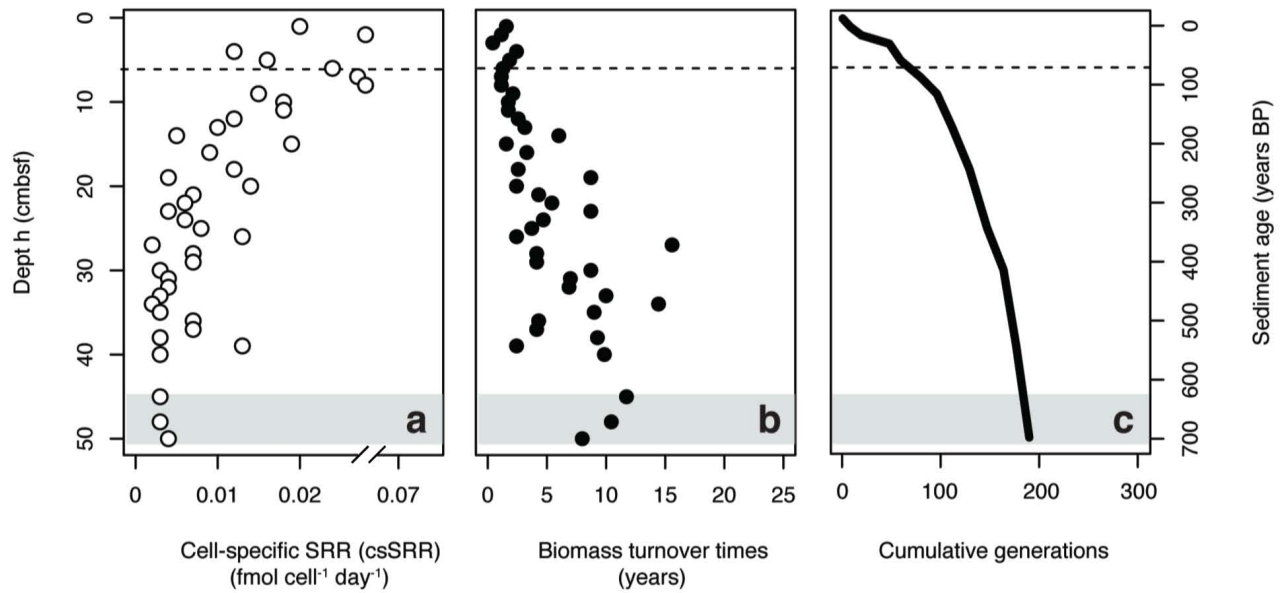

**Figure 6.** (a) Estimates of cell-specific sulfate reduction rates (csSRR) in the sediment core. (b) Estimated biomass turnover times of the total SRM community (c) Cumulative generations possible throughout the sediment core. All values were estimated using *dsrB* gene copy numbers as a proxy for SRM abundance, assuming a 7% DNA extraction efficiency. Gray shading indicates the onset of the SMT. Dashed lines in the surface indicate the bottom of the bioturbation zone.
